# Supplementary material for: In vitro reconstitution of branching microtubule nucleation
Source: eLife. 2020 Jan 14;9:e49769. doi: 10.7554/eLife.49769 (PMC6959987; doi:10.7554/eLife.49769)
Supplement: Figure 3—source data 1. [file elife-49769-fig3-data1.xlsx]

## Sheet: Figure 3b
	t=2 minutes					t=5 minutes
	Total number of Rhod MTs in a field of view	Numbers of branches per field of view	mean length of nucleated MTs (mm)			Total number of Rhod MTs in a field of view	Numbers of branches per field of view	mean length of nucleated MTs (mm)
	124	31	4.63			148	42	3.8
	145	33	2.88			102	41	4.05
	189	40	4.22			110	36	4.85
	197	33	3.06			121	36	4.96
	170	28	3.28			116	41	4.93
	167	35	3.24			134	49	3.53
	99	24	2.67			113	30	3.77
	94	17	2.86			110	39	3.12
	65	33	2.63			120	44	3.4
	86	42	2.9			149	53	3.68
Mean	134	32	3.24		Mean	122	41	4.01

## Sheet: Figure 3d
488MT + RhodMT	Total number of Rhod MTs in a field of view:	Numbers of branches per field of view	Average Percentage of branches
	40	2
	46	1
	21	3
	23	1
	23	1
	29	2
	19	0
	23	1
	31	4
	24	0
TOTAL	279	15	0.05
488MT-Augmin + RhodMT
	33	1
	43	5
	27	3
	23	2
	29	0
	23	6
	33	1
	35	0
	27	3
	32	3
TOTAL	305	24	0.08
488MT + RhodMT-g-TuRC
	27	3
	33	2
	32	4
	29	2
	35	4
	26	1
	35	2
	30	3
	35	5
	31	3
TOTAL	313	29	0.09
488MT-Augmin + RhodMT-g-TuRC
	36	24
	43	19
	32	19
	34	21
	42	18
	34	20
	30	18
	32	21
	40	20
	27	14
TOTAL	350	194	0.55
488MT-Augmin + 633GMPCPP-RhodMT-g-TuRC
	10	8
	18	10
	19	10
	19	18
	6	4
	18	13
	21	12
	16	9
	20	12
	24	13
	20	12
	26	15
	23	16
	19	13
	15	8
	19	13
	25	15
	19	12
	22	17
	24	16
TOTAL	383	246	0.64

## Sheet: Figure 3e
Acute Branch angle		Binned branch angle
3.28		0 to 10	10 to 20	20 to 30	30 to 40	40 to 50	50 to 60	60 to 70	70 to 80	80 to 90
7.97		2	5	12	19	19	25	13	14	7
10.01
14
16.49
17.82
17.91
21.7
21.71
22.2
22.38
22.62
26.57
26.6
27.64
28.39
28.9
29.34
29.65
30
30.07
30.96
31.26
32.91
33.56
33.93
34.14
34.99
35.71
35.75
36.61
36.72
36.87
37.3
37.87
38.66
38.66
38.81
40.19
40.6
42.82
43.09
43.21
45
45
45
46
46.31
46.33
46.62
46.85
46.94
47.29
49.4
49.4
49.64
49.76
50.19
50.44
51.3
51.34
51.91
51.91
52.13
52.13
52.13
52.13
52.13
52.33
53.8
54
55.49
55.52
55.67
56.3
56.31
56.31
56.31
56.31
58.48
59
59.04
60.71
61.35
61.59
61.7
62.72
62.74
63.43
65.7
66
67.17
67.59
67.88
69.78
70.56
71.57
71.57
72.15
72.41
74.05
74.2
74.42
75.78
75.96
78.11
78.11
79
79.85
80.46
82.75
83
85.6
86.96
87.51
88.15

## Sheet: Figure 3g
Branchpoint distance from -end, as assessed by GMPCPP seed (mm)	Full length of the green MT (mm)
0.1	6.3
0.1	7
0.2	2
0.3	4
0.6	4
0.7	6.7
0.7	4
0.8	2.8
0.8	3.1
0.9	4
0.9	3
1.1	13
1.1	7.1
1.2	8
1.3	3.1
1.4	5.8
1.4	8.1
1.4	8
1.4	7.4
1.4	5.3
1.7	2.9
1.7	2.9
1.8	6.7
1.9	5.2
1.9	4.4
2	7.1
2	6.9
2	11
2	4
2.1	4.5
2.2	4
2.2	5.2
2.5	4.9
2.5	4.4
2.5	4
2.6	5
2.6	4.9
2.6	7
2.6	5.5
2.6	3.2
2.8	6.3
2.8	6.7
2.8	7.5
2.8	8.7
2.9	6.5
2.9	9.3
2.9	4
2.9	7.3
3	7.5
3	6
3	8
3.2	4.3
3.2	7.6
3.2	8.9
3.2	6
3.4	4.9
3.4	9.2
3.4	15
3.6	6
3.7	7.1
3.7	5.4
3.8	6.3
3.8	6
3.8	5
3.8	7.3
3.8	7
3.9	6.8
4	6.2
4.1	9.7
4.1	8.3
4.2	9.6
4.2	14
4.3	5.3
4.3	5.8
4.5	10.6
4.6	6.3
4.6	6.7
4.8	12
4.9	7.5
4.9	12
5	6.2
5	13.2
5	6.6
5	9.3
5.1	8.9
5.3	8.5
5.4	9.3
5.6	7
5.7	10.4
5.8	10.2
6.2	9.3
6.7	8.7
6.7	14.7
6.9	9.3
6.9	10
7.8	9.3
8.4	12
8.9	11.5
8.9	9.9
9.5	14
